# Supplementary material
Source: Elsevier journal article supplement (https://www.sciencedirect.com/science/article/pii/S0300289613000227)
Supplement: mmc1 [file S0300289613000227:mmc1.doc]

**Anexo 1: Contenido de la parte teórica impartida en la primera jornada formativa**.

- Necesidad e importancia de la espirometría en AP.
- Importancia y necesidad de la espirometría para el diagnóstico de la EPOC.
- Importancia de la formación.
- Fisiología pulmonar básica.
- Tipos de espirómetros.
- Requisitos que debe cumplir un espirómetro en AP.
- Indicaciones y contraindicaciones de la espirometría.
- Realización de una espirometría: Técnica y requisitos previos.
- Mantenimiento y calibración de un espirómetro.
- Limpieza y desinfección de un espirómetro.
- Representación gráfica de una espirometría.
- Principales medidas espirométricas.
- Criterios de aceptabilidad y reproducibilidad.
- Patrones espirométricos.
- Prueba broncodilatadora.
- Orientación diagnóstica.

**Anexo 2: Ejemplo de uno de los ejercicios de un test de evaluación con sus dos**

**correspondientes preguntas.**

(Se incluye como figura – figura anexo 2)
